# Supplementary material
Source: PubMed Central journal article supplement (PMC5777333)
Supplement: NIHMS926273-supplement-supp_datasets_tables.pdf [file NIHMS926273-supplement-supp_datasets_tables.pdf]

## **Supplementary Data Sets and Tables for Ferretti et al.**

### **Supplementary Data Set 1**

**Enrichment of mRNAs between ribosome pools.**

### **Supplementary Data Set 2**

Related to Figure 1

**GO-terms associated with mRNAs enriched in the  $\Delta$ Rps26 and WT ribosomes.**

**Table S1: Yeast strains used in this work.**

| Strain | Description     | Background | Genotype                                                                                                                                                                                  | Reference       |
|--------|-----------------|------------|-------------------------------------------------------------------------------------------------------------------------------------------------------------------------------------------|-----------------|
| yKK73  | $\Delta$ Ltv1   | BY4741     | <i>MAT<math>\alpha</math> Ltv1::KanMX6 his3<math>\Delta</math>1 leu2<math>\Delta</math>0 met15<math>\Delta</math>0 ura3<math>\Delta</math>0</i>                                           | GE<br>Dharmacon |
| yKK135 | Rps3-TAP        | BY4741     | <i>MAT<math>\alpha</math> Rps3-TAP::HisMX6 leu2<math>\Delta</math>0 met15<math>\Delta</math>0 ura3<math>\Delta</math>0</i>                                                                | GE<br>Dharmacon |
| yKK200 | WT              | BY4741     | <i>MAT<math>\alpha</math> his3<math>\Delta</math>1 leu2<math>\Delta</math>0 met15<math>\Delta</math>0 ura3<math>\Delta</math>0</i>                                                        | Euroscarf       |
| yKK489 | GAL::Rps17      | BY4741     | <i>MAT<math>\alpha</math> NatMX6::pGAL1-Rps17B Rps17A::KanMX6 his3<math>\Delta</math>1 leu2<math>\Delta</math>0 met15<math>\Delta</math>0 ura3<math>\Delta</math>0</i>                    | This study      |
| yKK491 | GAL::Rps26      | BY4741     | <i>MAT<math>\alpha</math> NatMX6::pGAL1-Rps26A Rps26B::KanMX6 his3<math>\Delta</math>1 leu2<math>\Delta</math>0 met15<math>\Delta</math>0 ura3<math>\Delta</math>0</i>                    | This study      |
| yKK493 | GAL::Rps3       | BY4741     | <i>MAT<math>\alpha</math> KanMX6::pGAL1-Rps3 his3<math>\Delta</math>1 leu2<math>\Delta</math>0 met15<math>\Delta</math>0 ura3<math>\Delta</math>0</i>                                     | This study      |
| yKK636 | GAL::Rps26/Rps3 | BY4741     | <i>MAT<math>\alpha</math> HisMX6::pGAL1-Rps3 NatMX6::pGAL1-rps26A rps26B::KanMX6 his3<math>\Delta</math>1 leu2<math>\Delta</math>0 met15<math>\Delta</math>0 ura3<math>\Delta</math>0</i> | This study      |

**Table S2: Plasmids used in this work.**

| Plasmid | Description    | Backbone | Note                        | Detail          |
|---------|----------------|----------|-----------------------------|-----------------|
| pKK3792 | TET:Rps26A     | pCM189   |                             |                 |
| pKK3968 | TET:Rps17A     | pCM189   |                             |                 |
| pKK4015 | TET:Rps3       | pCM189   |                             |                 |
| pKK3566 | TET::Rps3-TAP  | pCM189   |                             |                 |
| pKK3678 | 3HA-Rim101     | pRS415   | Hayashi <i>et al</i> , 2005 |                 |
| pKK3782 | Firefly        | pRS413   | A <sub>10</sub>             | AAAAAAAAAAAAATG |
| pKK3700 | <i>Renilla</i> | pRS415   | A <sub>10</sub>             | AAAAAAAAAAAAATG |
| pKK3872 | <i>Renilla</i> | pRS415   | -7 to -10 G                 | GGGGAAAAAAAAATG |
| pKK3771 | <i>Renilla</i> | pRS415   | -3 C                        | AAAAAAACAAATG   |
| pKK3869 | <i>Renilla</i> | pRS415   | -4 G                        | AAAAAAGAAAATG   |
| pKK3766 | <i>Renilla</i> | pRS415   | -1 G                        | AAAAAAAAAAGATG  |
| pKK3849 | <i>Renilla</i> | pRS415   | -2 G                        | AAAAAAAAAGAATG  |

**Table S3: qPCR primers used in this work.**

| Gene                      | Systematic | Ribosome enrichment | Type | Sequence              |
|---------------------------|------------|---------------------|------|-----------------------|
| Sam3                      | YPL274W    | +Rps26              | FW   | CCTTGTTGCGGTTGTGTCAG  |
|                           |            |                     | RV   | GTCCTCCTTTTTCGAGGCCA  |
| Pgl1                      | YCR012W    | +Rps26              | FW   | GCTGCTTTGCCAACCATCAA  |
|                           |            |                     | RV   | GGCTTCAACTTCTGGACCGA  |
| Stm1                      | YLR150W    | +Rps26              | FW   | ACGCTGACGTTGTCTGTTTTG |
|                           |            |                     | RV   | TTCTTGGTGGTGGCAGAGTC  |
| Rpl3                      | YOR063W    | +Rps26              | FW   | TGGTTTCGTCCTACTACGGTG |
|                           |            |                     | RV   | GCTTTTCAGCTGGGGTTTGG  |
| Asc1                      | YMR116C    | +Rps26              | FW   | GGTGCTTACGCTTTGTCTGC  |
|                           |            |                     | RV   | ACATCGGACTTGTGACCGAC  |
| Abf1                      | YKL112W    | $\Delta$ Rps26      | FW   | AACACTCATCCGGACGACAC  |
|                           |            |                     | RV   | ACCATGAGTAGGACCGCTCT  |
| Gpr1                      | YDL035C    | $\Delta$ Rps26      | FW   | CCTTGAGTGCATGGTGCTA   |
|                           |            |                     | RV   | CCAGTGACCGAGCCCAAATA  |
| Bop2                      | YLR267W    | $\Delta$ Rps26      | FW   | TTCGAGAGGTGGTGGCTCTA  |
|                           |            |                     | RV   | TTCTGGGCCTTGTGAGCATT  |
| Mtl1                      | YGR023W    | $\Delta$ Rps26      | FW   | TCGGTTGTGTGGTTGGCATA  |
|                           |            |                     | RV   | CGATGGGGGAATCTGAGCTG  |
| Sda1                      | YGR245C    | $\Delta$ Rps26      | FW   | GAGCAGCTATGCTCCCAACA  |
|                           |            |                     | RV   | AGAATCACCTCCAGCAAGCC  |
| Mec1                      | YBR136W    | $\Delta$ Rps26      | FW   | GCGTTGGGCATAATTGGGAC  |
|                           |            |                     | RV   | CTGTTTGGCCAGCAACACTC  |
| Eap1                      | YKL204W    | $\Delta$ Rps26      | FW   | CAAGAGGAAACAGCAACGCC  |
|                           |            |                     | RV   | GGGAACCCCTGTGGTAATGG  |
| Rox1                      | YPR065W    | $\Delta$ Rps26      | FW   | CACGACCCTTCAACGAGACA  |
|                           |            |                     | RV   | CGCAGTTGTTGTGGATGTGG  |
| Rpl25                     | YOL127W    |                     | FW   | ATGCTTCCAAGGCTGTTCCA  |
|                           |            |                     | RV   | TCCTTGACGGCCTTCTTGAT  |
| Firefly luciferase        |            |                     | FW   | TCGAAAGAAGTCGGGGAAGC  |
|                           |            |                     | RV   | TCATCCCCCTCGGGTGTAAAT |
| <i>Renilla</i> luciferase |            |                     | FW   | GGTAACGCGGCCTCTTCTTA  |
|                           |            |                     | RV   | CCAGATTTGCCTGATTTGCC  |
